# Supplementary material
Source: PubMed Central journal article supplement (PMC3932874)
Supplement: 1317834111_pnas.201317834SI.pdf [file 1317834111_pnas.201317834SI.pdf]

# Supporting Information

Lidbury et al. 10.1073/pnas.1317834111

## SI Materials and Methods

**Construction of Marker-Exchange Mutants in *Ruegeria pomeroyi* DSS-3.** To construct a TMAO demethylase (*tdm*) mutant, we amplified a region toward the 5' end (with PstI/EcoRI and XbaI sites engineered in) and a region toward the 3' end (with a HindIII and XbaI engineered in) of the target gene (SPO1562). The two regions were subcloned, along with a gentamycin gene cassette, amplified from p34S-Gm (1), and inserted at an XbaI site between the two regions, into the cloning vector pGEM-T (Promega). The entire construct was ligated into the suicide vector pK18mobsacB at sites PstI and HindIII. The plasmid was transformed into *Escherichia coli* S17.1 via electroporation and mobilized into *R. pomeroyi* via conjugation, using 1/2 YTSS as the medium (DSMZ). Transconjugants were selected for on the sea salts minimal medium as described in ref. 2 with gentamicin ( $10 \mu\text{g}\cdot\text{mL}^{-1}$ ) and monomethylamine (MMA) (3 mM) as a sole N source. Double-crossover mutants were selected by their sensitivity to kanamycin and homologous recombination was confirmed by PCR and DNA sequencing.

To construct a TMA monooxygenase (*tmm*) mutant, a 770-bp region of SPO1551 (*tmm*) was amplified by PCR (primers used are listed in Table S4) and subsequently cloned into pK18mobsacB via XbaI and HindIII sites. A gentamycin gene cassette was released from plasmid p34S-Gm using SalI, which was then inserted into pK18mobsacB. The resulting plasmid was transformed into *E. coli* S17.1 via electroporation and mobilized into *R. pomeroyi* DSS-3 via conjugation. Double-crossover mutants were selected as described above and confirmed by PCR and DNA sequencing.

**Complementation of the *tdm* Mutant with the Native *tdm* of *R. pomeroyi* DSS-3 and the *tdm* of *Pelagibacter* sp. Strain HIMB59.** The promoter of the *tdm* in *R. pomeroyi* was amplified with an XbaI and an NdeI site engineered at 5' and 3' end, respectively, and subcloned into pGEM-T vector. The construct was released from pGEM-T and inserted into the pET28a containing the *tdm* from either *R. pomeroyi* or strain HIMB59. The promoter and gene were released and inserted into the broad-host-range plasmid pBBR1MCS-km at sites XbaI/EcoRI for the native *tdm* of *R. pomeroyi* and sites XbaI/BamHI for *tdm* of strain HIMB59. The plasmid was transformed via electroporation into *E. coli* S17.1 and then mobilized into the *tdm* mutant via conjugation. Transconjugants were selected for as described above, but replacing the gentamicin with kanamycin ( $80 \mu\text{g}\cdot\text{mL}^{-1}$ ).

## Complementation of *tmoX* Mutant in *R. pomeroyi* with Its Native *tmoX*.

Because of substrate-binding protein of the TMAO transporter (*tmoX*) seemed to be toxic to the *E. coli* JM109 competent cells, we amplified the promoter and *tmoX* gene separately. We amplified the promoter (250 bp upstream region) of *tmoX* (engineering the sites HindIII and BamHI at the 5' and 3' end, respectively) and subcloned it into pGEM-T. We then amplified the *tmoX* gene (engineering the sites BamHI and XbaI at the 5' and 3' end, respectively) and subcloned into pGEM-T. The *tmoX* gene was released from pGEM-T and ligated into the plasmid pBBR1MSC-km using the engineered restriction sites. The promoter was subsequently ligated in at sites HindIII and BamHI. The ligation mixture was desalted using the NucleoSpin Gel and PCR clean-up kit (Macherey–Nagel) and transformed into *R. pomeroyi* via electroporation. The settings used were 2.5 kV/mm, 200 A resistance, and 25  $\Omega$  capacitance. The time constant varied between 3.9 and 4.5 ms.

Electrocompetent cells were prepared by modifying the protocol in ref. 3. Briefly, *R. pomeroyi* was grown in a minimal medium with glucose (10 mM) as the C source and ammonium (16 mM) as the N source. Cells (50 mL) were incubated at 30 °C until the cultures reached an  $\text{OD}_{540}$  of  $\sim 0.4$ . Cells were washed four times with ice-cold, sterile 10% (vol/vol) glycerol to remove salts and then resuspended in a final volume of 2 mL and 50- $\mu\text{L}$  aliquots were rapidly frozen in dry ice/ethanol. Aliquots were stored at  $-80$  °C until use.

**Overexpression of Tdm in *E. coli*.** The *tdm* gene from *R. pomeroyi* DSS-3 was amplified by PCR (primers used are listed in Table S4) and subcloned into the pGEM-T vector (Promega). The *tdm* gene was then excised using the NdeI/EcoRI sites and ligated into the expression vector pET28a (Merck Biosciences). The *tdm* gene from *Pelagibacteraceae* strain HIMB59 was chemically synthesized with *E. coli* codon use (GenScript Corporation). The synthesized gene was inserted into the expression vector pET28a using the NdeI/BamHI sites. The resulting plasmids were then transformed into the expression host *E. coli* BLR(DE3) pLysS (Merck Biosciences). To overexpress Tdm, *E. coli* cells were grown at 37 °C to an  $\text{OD}_{600}$  of 0.6. Isopropyl  $\beta$ -D-1-thiogalactopyranoside was then added to a final concentration of 0.2 mM and trimethylamine *N*-oxide (TMAO) was added to a final concentration of 1 mM. Cultures were then incubated at 25 °C for 20 h before assaying supernatant for dimethylamine (DMA) production from TMAO on a cation-exchange ion chromatograph equipped with a Metrosep C4/250-mm separation column and a conductivity detector (Metrohm).

1. Dennis JJ, Zylstra GJ (1998) Plasmids: Modular self-cloning minitransposon derivatives for rapid genetic analysis of gram-negative bacterial genomes. *Appl Environ Microbiol* 64(7):2710–2715.

2. Chen Y, Patel NA, Crombie A, Scrivens JH, Murrell JC (2011) Bacterial flavin-containing monooxygenase is trimethylamine monooxygenase. *Proc Natl Acad Sci USA* 108(43):17791–17796.

3. Sebastian M, Ammerman JW (2009) The alkaline phosphatase PhoX is more widely distributed in marine bacteria than the classical PhoA. *ISME J* 3(5):563–572.

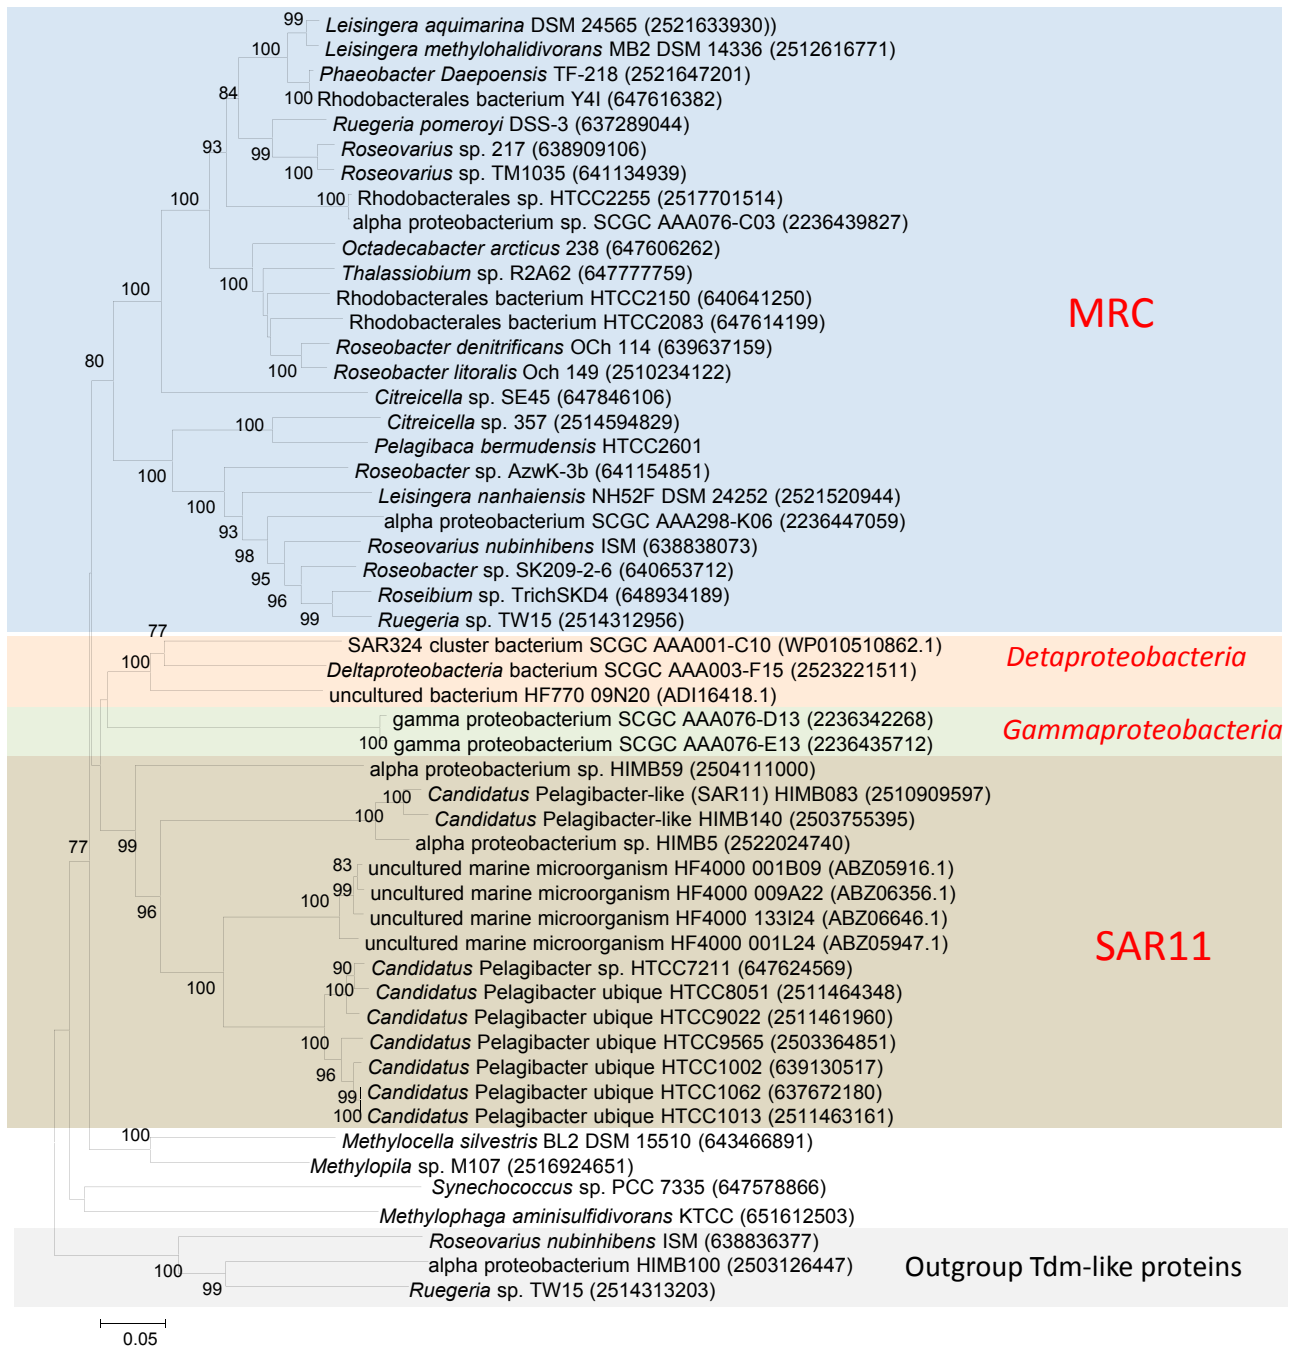

**Fig. S1.** Phylogenetic distribution of the *tdm* gene among marine bacteria. Nodes at some of the major branched with high bootstrap values (500 replicates) are indicated.

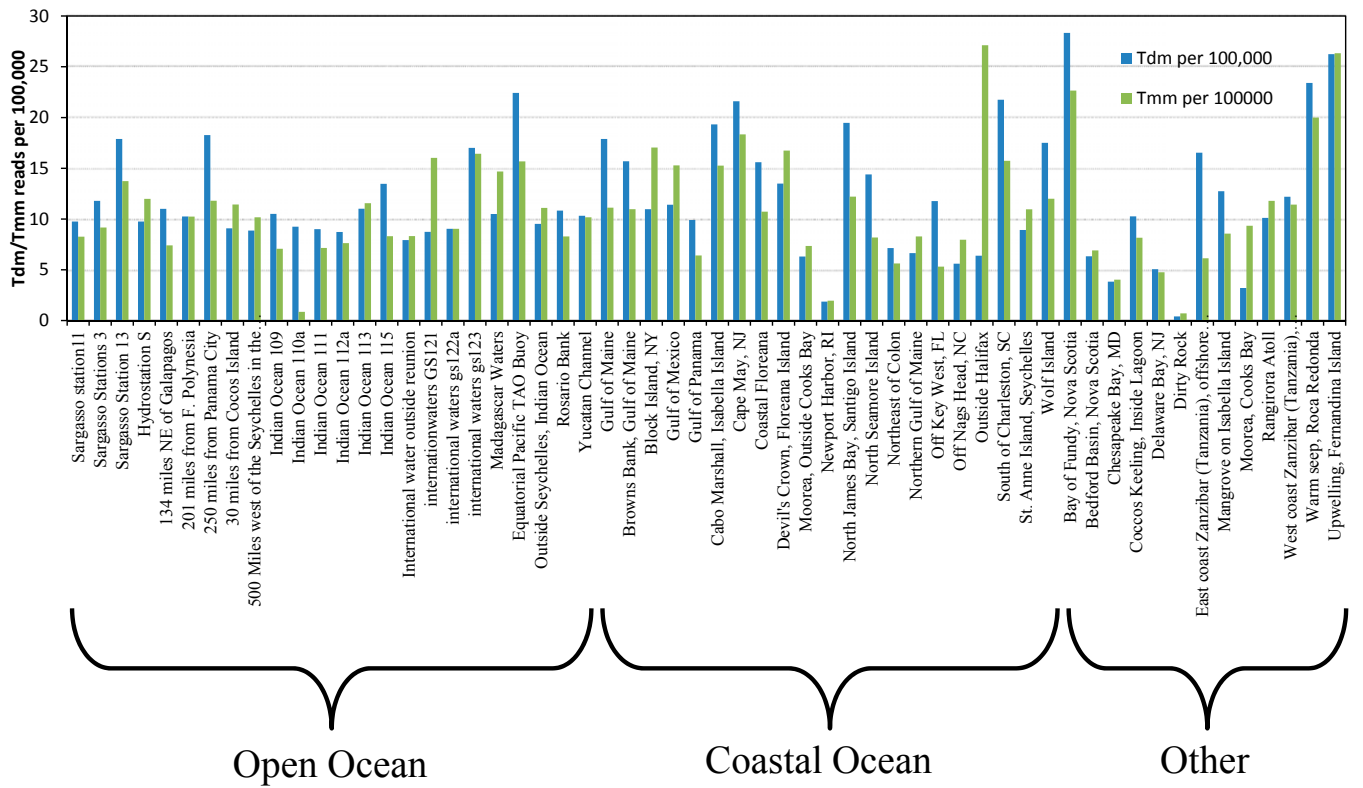

**Fig. S2.** Abundance of Tmm and Tdm at sites throughout the Global Ocean Survey. Protein abundances are given per 100,000 reads. Protein sizes were normalized against RecA.

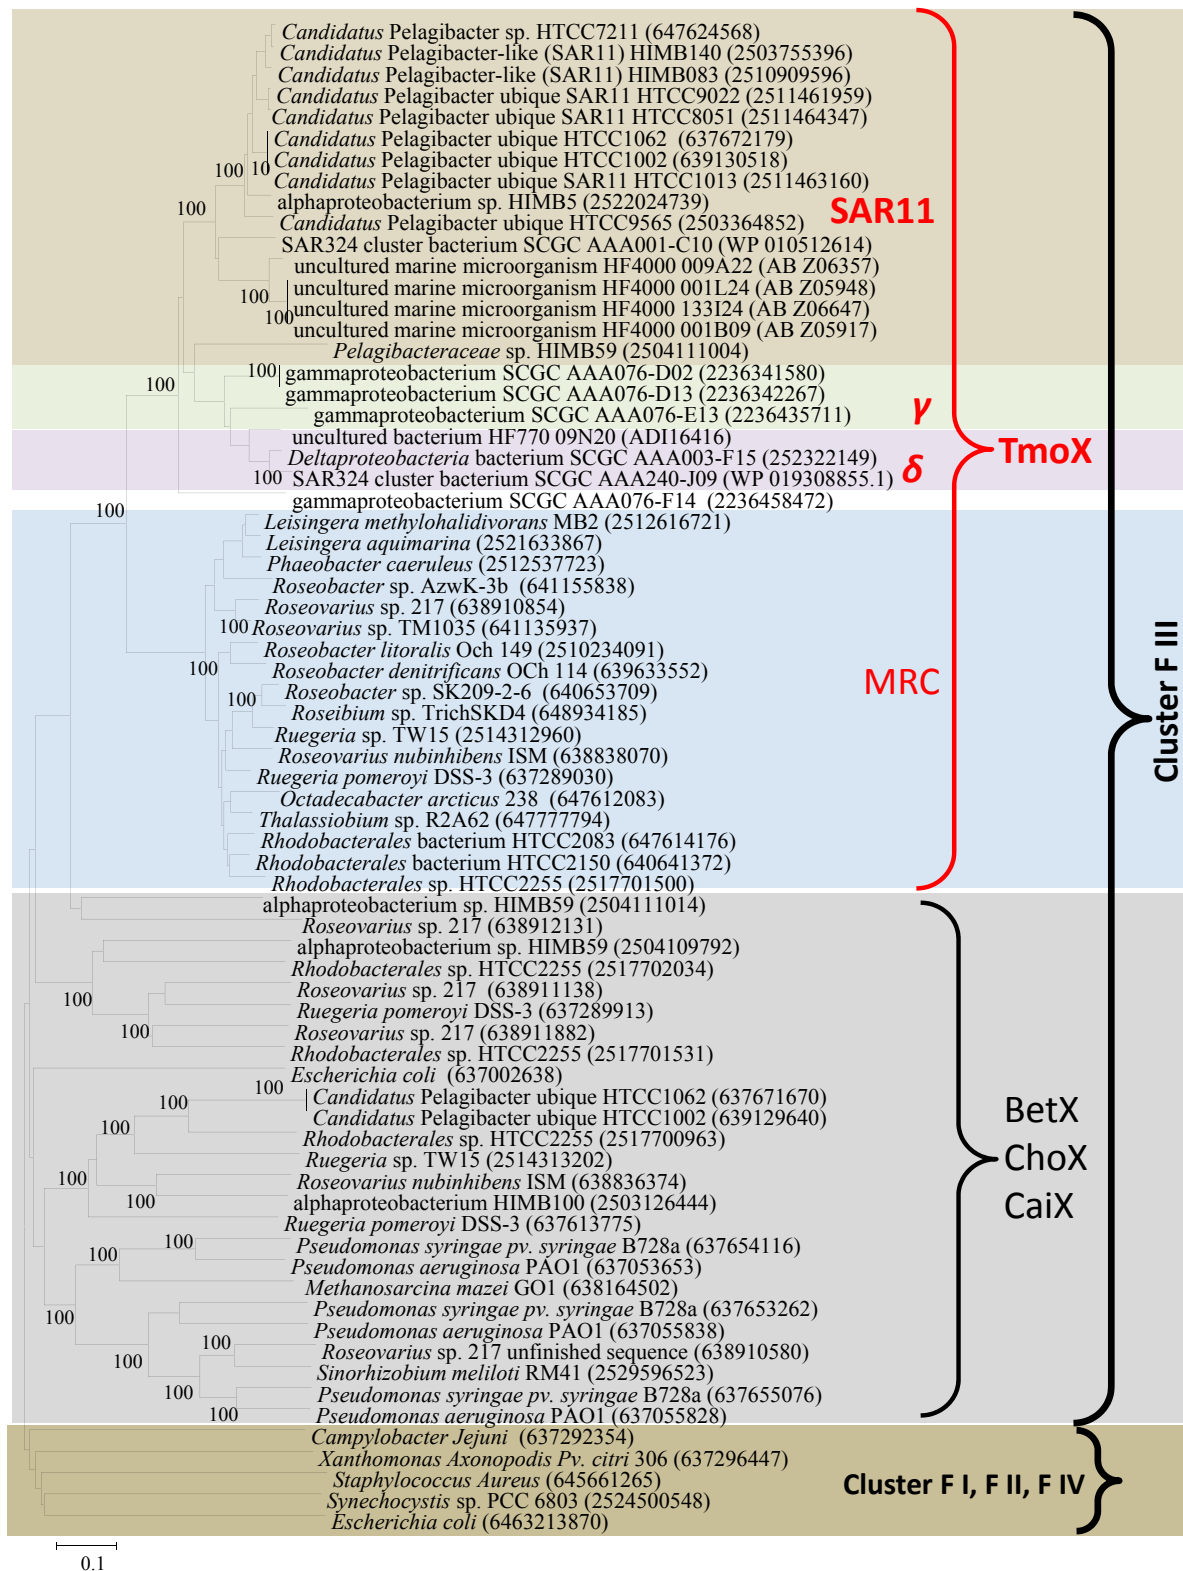

**Fig. S3.** Neighbor-joining phylogenetic tree showing the distribution of *tmoX* among marine bacteria. High bootstrap values (500 replicates) at some of the major nodes are shown. Integrated Microbial Genomes (IMG) gene numbers are given in brackets. Where no IMG gene number is possible, the National Center for Biotechnology Information accession number was used.



**Table S2. Distribution of *tmm* and *tdm* among isolates from the marine *Roseobacter* clade and growth of marine *Roseobacter* clade isolates on TMA and TMAO**

| Strain                                      | <i>tmm</i> | <i>tdm</i> | TMA | TMAO |
|---------------------------------------------|------------|------------|-----|------|
| <i>Citreicella</i> sp. E45                  | +          | +          | +   | +    |
| <i>Citreicella</i> sp. 357                  | +          | +          | NT  | NT   |
| <i>Dinoroseobacter shibae</i> DFL12         | -          | -          | -   | -    |
| <i>Jannashia</i> sp. CCS1                   | -          | -          | NT  | NT   |
| <i>Labrenzia aggregata</i> IAM 12614        | -          | -          | NT  | NT   |
| <i>Labrenzia alexandrii</i> DFL-11          | -          | -          | NT  | NT   |
| <i>Loktanella</i> sp. CCS2                  | -          | -          | NT  | NT   |
| <i>Loktanella vestfoldensis</i> SKA53       | -          | -          | NT  | NT   |
| <i>Maritimibacter alkaliphilus</i> HTCC2654 | -          | -          | NT  | NT   |
| <i>Nautella italic</i> R11                  | -          | -          | NT  | NT   |
| <i>Oceanibulbus indolifex</i> HEL-45        | -          | -          | NT  | NT   |
| <i>Oceanicola batsensis</i> HTCC2597        | -          | -          | -   | -    |
| <i>Oceanicola granulosis</i> HTCC2516       | -          | -          | NT  | NT   |
| <i>Octadecabacter antarcticus</i> 238       | +          | +          | NT  | NT   |
| <i>Octadecabacter antarcticus</i> 307       | -          | -          | NT  | NT   |
| <i>Pelagibaca bermudensis</i> HTCC2601      | +          | +          | NT  | NT   |
| <i>Phaeobacter gallaeciensis</i> 2.10       | -          | -          | NT  | NT   |
| <i>Phaeobacter gallaeciensis</i> BS107      | -          | -          | -   | -    |
| <i>Roseibium</i> sp. TrichSKD4              | -          | +          | NT  | NT   |
| <i>Roseobacter denitrificans</i> OCh 114    | +          | +          | +   | +    |
| <i>Roseobacter litoralis</i> Och 149        | +          | +          | +   | +    |
| <i>Roseobacter</i> sp. AzwK-3b              | +          | +          | NT  | NT   |
| <i>Roseobacter</i> sp. MED193               | -          | -          | -   | -    |
| <i>Roseobacter</i> sp. SK209-2-6            | -          | +          | -   | +    |
| <i>Roseovarius nubinhibens</i> ISM          | +          | +          | +   | +    |
| <i>Roseovarius</i> sp. 217                  | +          | +          | +   | +    |
| <i>Roseovarius</i> sp. TM1035               | +          | +          | +   | +    |
| <i>Ruegeria lacuscaerulensis</i> ITI-1157   | -          | -          | NT  | NT   |
| <i>Ruegeria pomeroyi</i> DSS-3              | +          | +          | +   | +    |
| <i>Ruegeria</i> sp. TW15                    | -          | +          | NT  | NT   |
| <i>Ruegeria</i> sp. TM1040                  | -          | -          | NT  | NT   |
| <i>Ruegeria</i> sp. TrichCH4B               | -          | -          | NT  | NT   |
| <i>Sagittula stellata</i> E-37              | -          | -          | -   | -    |
| <i>Sulfitobacter</i> sp. EE-36              | -          | -          | -   | -    |
| <i>Sulfitobacter</i> sp. GAI101             | -          | -          | NT  | NT   |
| <i>Sulfitobacter</i> sp. NAS-14.1           | -          | -          | NT  | NT   |
| <i>Thalassobium</i> sp. R2A62               | +          | +          | NT  | NT   |
| Rhodobacterales bacterium HTCC2083          | +          | +          | NT  | NT   |
| Rhodobacterales bacterium HTCC2150          | +          | +          | NT  | NT   |
| Rhodobacterales bacterium Y4I               | +          | +          | NT  | NT   |
| Rhodobacteraceae bacterium KLH11            | -          | -          | NT  | NT   |
| Rhodobacterales sp. HTCC2255                | +          | +          | NT  | NT   |

NT, not tested.

**Table S3. Bacterial strains and plasmids used in this study**

| Plasmids/strains                            | Description/use                                                                                                                    | Source         |
|---------------------------------------------|------------------------------------------------------------------------------------------------------------------------------------|----------------|
| <i>E. coli</i> BLR(DE3) pLysS               | Host for heterologous protein expression                                                                                           | Promega        |
| <i>E. coli</i> S17.1                        | Electrocompetent cells used for conjugation                                                                                        | Lab collection |
| <i>E. coli</i> JM109                        | Routine host for cloning                                                                                                           | Promega        |
| <i>R. pomeroyi</i> DSS-3                    | Wild type                                                                                                                          | 1              |
| <i>R. pomeroyi</i> DSS-3 $\Delta tmm::Gm$   | Wild type with disrupted <i>tmm</i>                                                                                                | This study     |
| <i>R. pomeroyi</i> DSS-3 $\Delta tdm::Gm$   | Wild type with disrupted <i>tdm</i>                                                                                                | This study     |
| <i>R. pomeroyi</i> DSS-3 $\Delta +DSS-3$    | <i>tdm</i> mutant complemented with pBIL001                                                                                        | This study     |
| <i>R. pomeroyi</i> DSS-3 $\Delta +HIMB59$   | <i>tdm</i> mutant complemented with pBIL002                                                                                        | This study     |
| <i>R. pomeroyi</i> DSS-3 $\Delta tmoXW::Gm$ | Wild type with disrupted <i>tmoXW</i>                                                                                              | This study     |
| <i>R. pomeroyi</i> DSS-3 $\Delta tmoX::Gm$  | Wild type with disrupted <i>tmoX</i>                                                                                               | This study     |
| <i>R. pomeroyi</i> DSS-3 $\Delta +tmoX$     | <i>tmoX</i> mutant complemented with pBIL101                                                                                       | This study     |
| p345-Gm                                     | Source of a gentamycin gene cassette                                                                                               | 2              |
| pK18mobsacB                                 | Suicide vector for <i>R. pomeroyi</i> , Kan <sup>R</sup>                                                                           | 3              |
| pBBR1MCS-km                                 | Broad-host-range plasmid (Kan <sup>R</sup> )                                                                                       | 4              |
| pBIO1878                                    | Spc <sup>R</sup> derivative of pMP220 with <i>lacZ</i> reporter gene                                                               | 5              |
| pBIL001                                     | SPO1562 ( <i>tdm</i> ) and its promoter cloned into pBBR1MCS-km                                                                    | This study     |
| pBIL002                                     | <i>tdm</i> of <i>Pelagibacter</i> strain HIMB59 and the promoter of SPO1562 cloned into pBBR1MCS-km                                | This study     |
| pBIL101                                     | SPO1548 ( <i>tmoX</i> ) and its promoter cloned into pBBR1MCS-km                                                                   | This study     |
| pKIL101                                     | Internal fragment of SPO1562 ( <i>tdm</i> ) and the Gm <sup>R</sup> cassette cloned into pK18mobsacB                               | This study     |
| pKIL201                                     | Internal fragment of SPO1548 ( <i>tmoX</i> ) and SPO1549 ( <i>tmoXV</i> ) and the Gm <sup>R</sup> cassette cloned into pK18mobsacB | This study     |
| pKIL202                                     | Internal fragment of SPO1548 ( <i>tmoX</i> ) and the Gm <sup>R</sup> cassette cloned into pK18mobsacB                              | This study     |
| pBIOIL101                                   | SPO1548 ( <i>tmoX</i> ) promoter cloned into pBIO1878                                                                              | This Study     |

- González JM, et al. (2003) *Silicibacter pomeroyi* sp. nov. and *Roseovarius nubinhibens* sp. nov., dimethylsulfoniopropionate-demethylating bacteria from marine environments. *Int J Syst Evol Microbiol* 53(Pt 5):1261–1269.
- Dennis JJ, Zylstra GJ (1998) Plasposons: Modular self-cloning minitransposon derivatives for rapid genetic analysis of gram-negative bacterial genomes. *Appl Environ Microbiol* 64(7):2710–2715.
- Schäfer A, et al. (1994) Small mobilizable multi-purpose cloning vectors derived from the *Escherichia coli* plasmids pK18 and pK19: Selection of defined deletions in the chromosome of *Corynebacterium glutamicum*. *Gene* 145(1):69–73.
- Kovach ME, et al. (1995) Four new derivatives of the broad-host-range cloning vector pBBR1MCS, carrying different antibiotic-resistance cassettes. *Gene* 166(1):175–176.
- Todd JD, Kirkwood M, Newton-Payne S, Johnston AWB (2012) DddW, a third DMSP lyase in a model *Roseobacter* marine bacterium, *Ruegeria pomeroyi* DSS-3. *ISME J* 6(1):223–226.

**Table S4. All PCR primers used in this study**

| Primer               | Sequence                             | Used for                                          |
|----------------------|--------------------------------------|---------------------------------------------------|
| Tdm_AF1_EcoRI        | ATCAGGAATTCACCGTGTGAGATCGTCTGTG      | Cloning region A of SPO1562 ( <i>tdm</i> )        |
| Tdm_AR1_XbaI         | AATGCTCTAGAACACTGGAAATCGGTGCATT      | Cloning region A of SPO1562 ( <i>tdm</i> )        |
| Tdm_BF1_XbaI         | AATGCTCTAGAGTCTATACCGCCATGTGCT       | Cloning region B of SPO1562 ( <i>tdm</i> )        |
| Tdm_BR1_PstI         | CAATGCTGCAGTAGCCGCAAGATCAACC         | Cloning region B of SPO1562 ( <i>tdm</i> )        |
| Tdm_CONF_F1          | GAACGGAACGCTATGTGGTT                 | Confirmation of $\Delta tdm:Gm$                   |
| Tdm_CONF_F2          | TCTCCATCCGGTCGTAAG                   | Confirmation of $\Delta tdm:Gm$                   |
| Tmm_F_XbaI           | GTACGCTCTAGACGCTGGATCGACTACAATGA     | Cloning of SPO1551 ( <i>tmm</i> )                 |
| Tmm_R_HindIII        | GTTACGAAGCTTGCACACAGTTCCTTGACGTA     | Cloning of SPO1551 ( <i>tmm</i> )                 |
| Tmm_CONF             | TCTGGAATTCGCCGACTATT                 | Confirmation of $\Delta tmm:Gm$                   |
| Tmm_CONR             | AGATACGCCCTCCATGCTGTC                | Confirmation of $\Delta tmm:Gm$                   |
| TmoX_AF_HindIII      | CAATAAGCTTTCGCTCTGCTTTGACATGAG       | Cloning region A of SPO1548 ( <i>tmoX</i> )       |
| TmoX_AR_XbaI         | CAATTCTAGAAAAGGCCCTTCCCACAC          | Cloning region A of SPO1548 ( <i>tmoX</i> )       |
| TmoX_BF_XbaI         | CAATTCTAGAACTTTGCCGAAGCGGTCT         | Cloning region B of SPO1548 ( <i>tmoX</i> )       |
| TmoX_BR_PstI         | CAATCTGCAGGCGCAATATCGTCGAAC          | Cloning region B of SPO1548 ( <i>tmoX</i> )       |
| TmoX_CONF_F1         | ATCTGCGCGAGGAACATAAC                 | Confirmation of $\Delta tmoX:Gm$                  |
| TmoX_CONF_R1         | AAAGGACTGGAACACCATGC                 | Confirmation of $\Delta tmoX:Gm$                  |
| TmoXW_AF_HindIII     | CAATAAGCTTGAATTCGCTGCAATGATCC        | Cloning region A of SPO1548 ( <i>tmoX</i> )       |
| TmoXW_AR_XbaI        | CAATTCTAGAACCGGACCATCCAGATAGC        | Cloning region A of SPO1548 ( <i>tmoX</i> )       |
| TmoXW_BF_XbaI        | CAATTCTAGAGGGCGCGAGGATTATTTTC        | Cloning region B of SPO1549 ( <i>tmoW</i> )       |
| TmoXW_BR_PstI        | CAATCTGCAGGCTTGCCTTCAACAGGATGT       | Cloning region B of SPO1549 ( <i>tmoW</i> )       |
| TmoXW_CONF_F1        | CCGTTTCGATTTGGTTCGTATT               | Confirmation of $\Delta tmoXW:Gm$                 |
| TmoXW_CONF_R1        | ATGTCCCATTTGTCGATCAT                 | Confirmation of $\Delta tmoXW:Gm$                 |
| Tdm_DSS-3_F1_NdeI    | CAATCATATGATGCTGGATACCAAAATATCCCAGAT | Cloning SPO1562 ( <i>tdm</i> )                    |
| Tdm_DSS-3_R1_EcoRI   | CAATGAATTTCTCAAGAGCGGGTCTGGTTTTCTGCG | Cloning SPO1562 ( <i>tdm</i> )                    |
| Tdm_prom_F1_XbaI     | CAATCATATGGTTGCCACTCCGGTCATTTG       | Cloning the promoter of SPO1562 ( <i>tdm</i> )    |
| Tdm_prom_R1_NdeI     | CAATTCTAGAAACCCAGCCCGGTCCGCCAG       | Cloning the promoter of SPO1562 ( <i>tdm</i> )    |
| TmoX_Prom_F_KpnI     | CAATGGTCCAATTCAAAATCAACGCGCAAT       | Cloning the TmoXWV promoter <i>lac</i> fusion     |
| TmoX_Prom_R_PstI     | CAATCTGCAGGCCGCCGAACCTGGAGAGAGTG     | Cloning the TmoXWV promoter for <i>lac</i> fusion |
| TmoX_F1_BamHI        | CAGAGGATCCGTGCGATTGTTTCGAGAAATCGC    | Cloning SPO1548 ( <i>tmoX</i> )                   |
| TmoX_R1_XbaI         | CAATTCTAGAGATTAGCCGTCCAGCCAGGGCGG    | Cloning SPO1548 ( <i>tmoX</i> )                   |
| TmoX_Prom_F2_HindIII | CAATAAGCTTATTCAAAATCAACGCGCAAT       | Cloning the promoter of SPO1548 ( <i>tmoX</i> )   |
| TmoX_Prom_R2_BamHI   | CAATGGATCCGCCGCCGAACCTGGAGAGAGTG     | Cloning the promoter of SPO1548 ( <i>tmoX</i> )   |
